# Supplementary material for: Circulating and local nuclear expression of survivin and fibulin-3 genes in discriminating benign from malignant respiratory diseases: correlation analysis
Source: Oxford University Press journal article supplement (doi:10.1042/bsr20203097), 2020-11-23
Supplement: bsr-2020-3097_supp.pdf [file bsr-2020-3097_supp.pdf]

## Supplementary materials

### **Circulating and local nuclear expression of survivin and fibulin-3 genes in discriminating benign from malignant respiratory diseases: Correlation analysis**

**Running title:** Survivin and fibulin-3 in respiratory diseases

**Mohammed H. Hassan<sup>1,\*</sup> Sawsan Abuhamdah<sup>2,3</sup> Mohamed Abdel-Bary<sup>4</sup>,  
Mohammed Wahman<sup>5</sup>, Tarek Hamdy Abd-Elhamid<sup>6</sup>, Morris Beshay<sup>7</sup>, Karam  
Mosallam<sup>4</sup>, Bakheet E.M. Elsadek<sup>8</sup>**

<sup>1</sup>Department of Medical Biochemistry, Faculty of Medicine, South Valley University, Qena, Egypt.

<sup>2</sup>College of Pharmacy, Al Ain University, Abu Dhabi, UAE.

<sup>3</sup>Department of Biopharmaceutics and Clinical Pharmacy, Faculty of Pharmacy, The University of Jordan, Amman, Jordan.

<sup>4</sup>Department of Cardio-Thoracic Surgery, Faculty of Medicine, South Valley University, Qena, Egypt.

<sup>5</sup>Department of Oncology and Nuclear Medicine, Faculty of Medicine, South Valley University, Qena, Egypt.

<sup>6</sup>Department of Histology and Cell Biology, Faculty of Medicine, Assiut University, Assiut, Egypt.

<sup>7</sup>Department of General Thoracic Surgery, Protestant Hospital of Bethel Foundation, Burgsteig 13, Bielefeld, Germany.

<sup>8</sup>Department of Biochemistry, Faculty of Pharmacy, Al-Azhar University, Assiut Branch, 71524 Assiut, Egypt.

**Corresponding author:** \*To whom correspondence should be addressed:

Dr. Mohammed H. Hassan, Associate Professor of Medical Biochemistry, Faculty of Medicine, South Valley University, Qena, Egypt.

E-mail: [Mohammedhosnyhassaan@yahoo.com](mailto:Mohammedhosnyhassaan@yahoo.com);

[mohammedhosnyhassaan@med.svu.edu.eg](mailto:mohammedhosnyhassaan@med.svu.edu.eg); Tel.: +201098473605

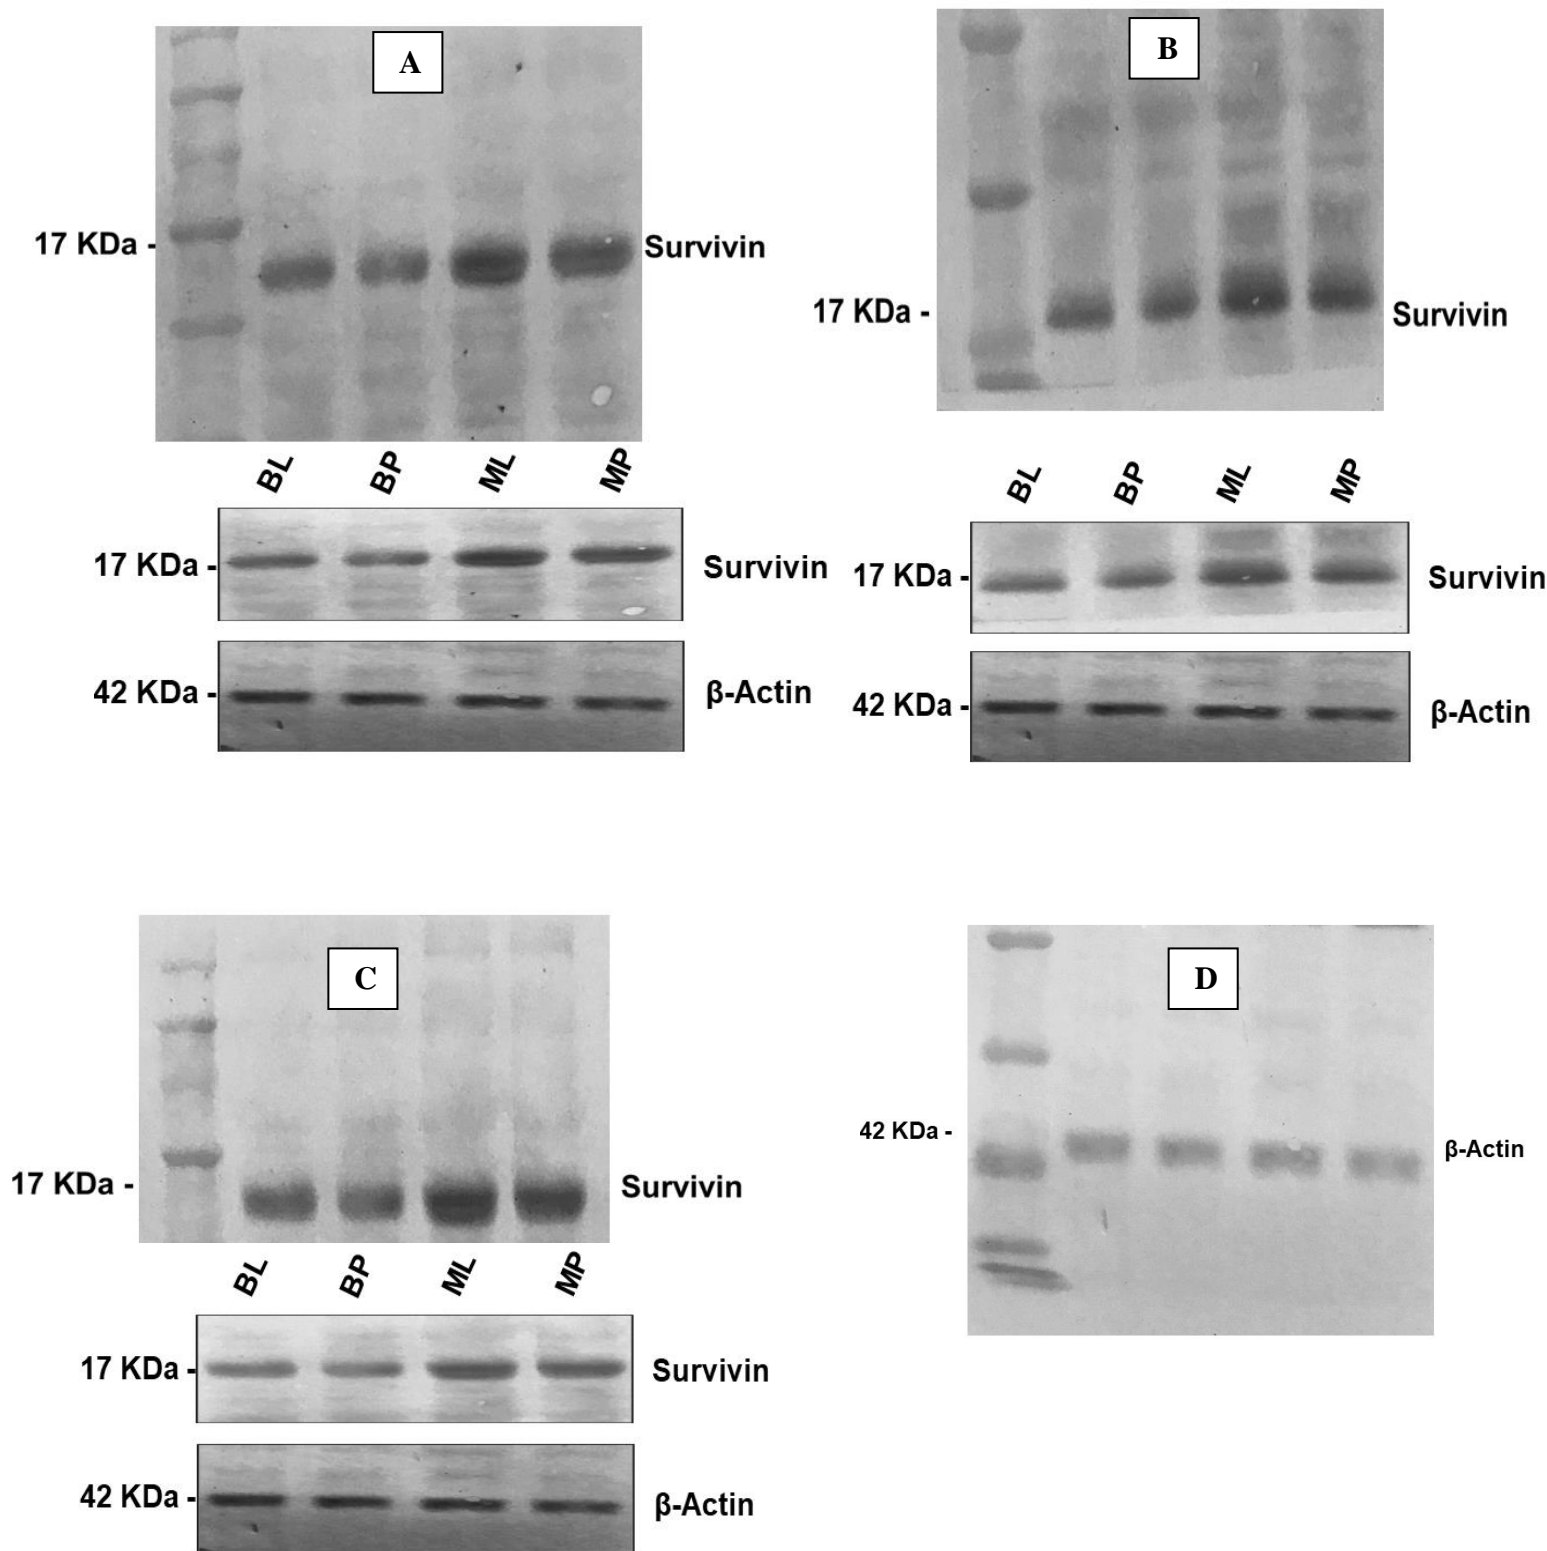

**Supplementary Figure1.** Full uncropped and unedited versions of the western blots for survivin expression (A): First run; (B) second run; (C): third run; (D)  $\beta$ -actin; from patients with various benign and malignant respiratory diseases to assure the reproducibility of results. BL, benign lung diseases; BP, benign pleural diseases; ML, malignant lung diseases; MP, malignant pleural diseases.

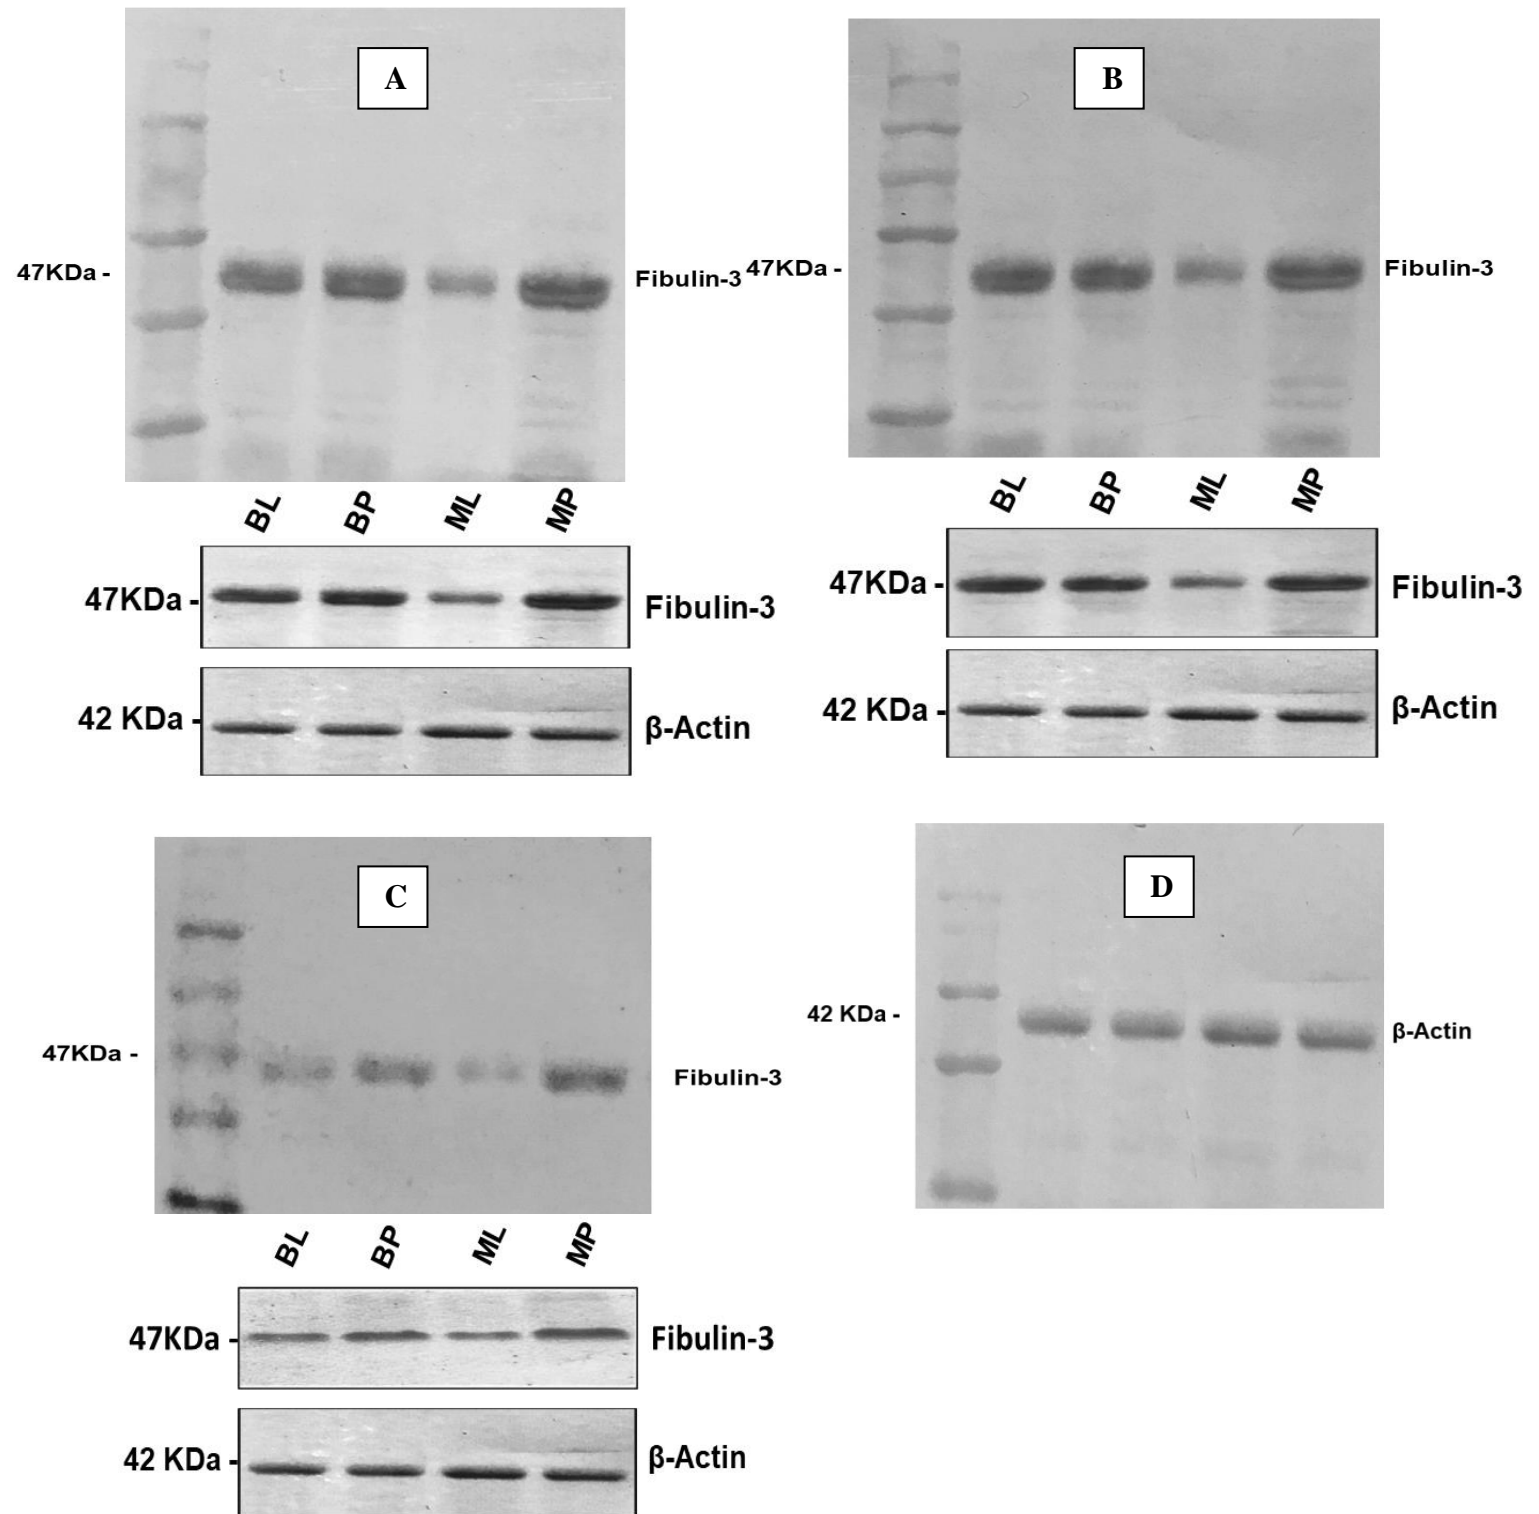

**Supplementary Figure 2.** Full uncropped and unedited versions of the western blots for fibulin-3 expression (A): First run; (B) second run; (C): third run; (D)  $\beta$ -actin; from patients with various benign and malignant respiratory diseases to assure the reproducibility of results. BL, benign lung diseases; BP, benign pleural diseases; ML, malignant lung diseases; MP, malignant pleural diseases.
